# Supplementary material
Source: PubMed Central journal article supplement (PMC3338939)
Supplement: mabs0401_0024SD1.pdf [file mabs0401_0024SD1.pdf]

Supplemental material to:

Catalin E. Doneanu, Alex Xenopoulos, Keith Fadgen, Jim Murphy, St John

Skilton, Holly Prentice, et al. Analysis of host-cell proteins in biotherapeutic

proteins by comprehensive online two-dimensional liquid chromatography/mass

spectrometry. *mAbs* 2012; 4(1); DOI: 10.4161/mabs.4.1.18748;

<http://www.landesbioscience.com/journals/mabs/article/18748>

1: TOF MS ES+  
BPI  
800

Flow rate = 4  $\mu$ L/min

Column Temp = 35°C

Average PW at full base = 20 sec = 0.33 min

Peak capacity:

$$(69.6 - 16.3) / 0.33 = 160$$

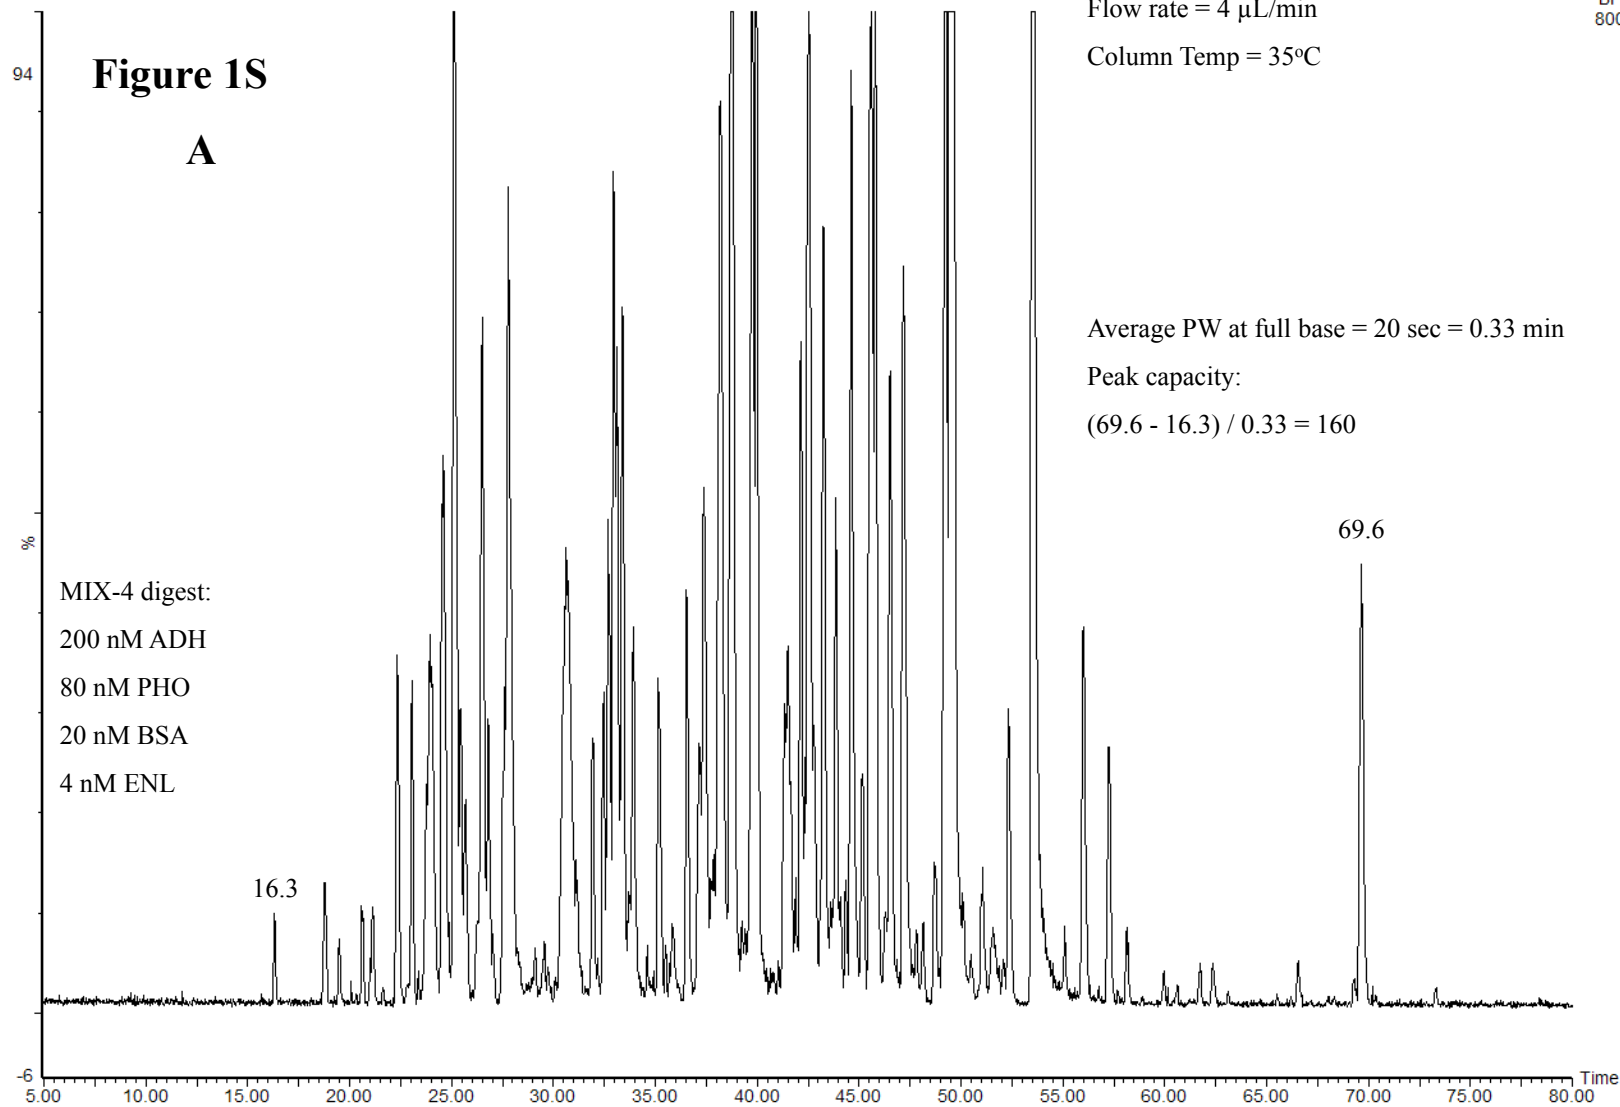

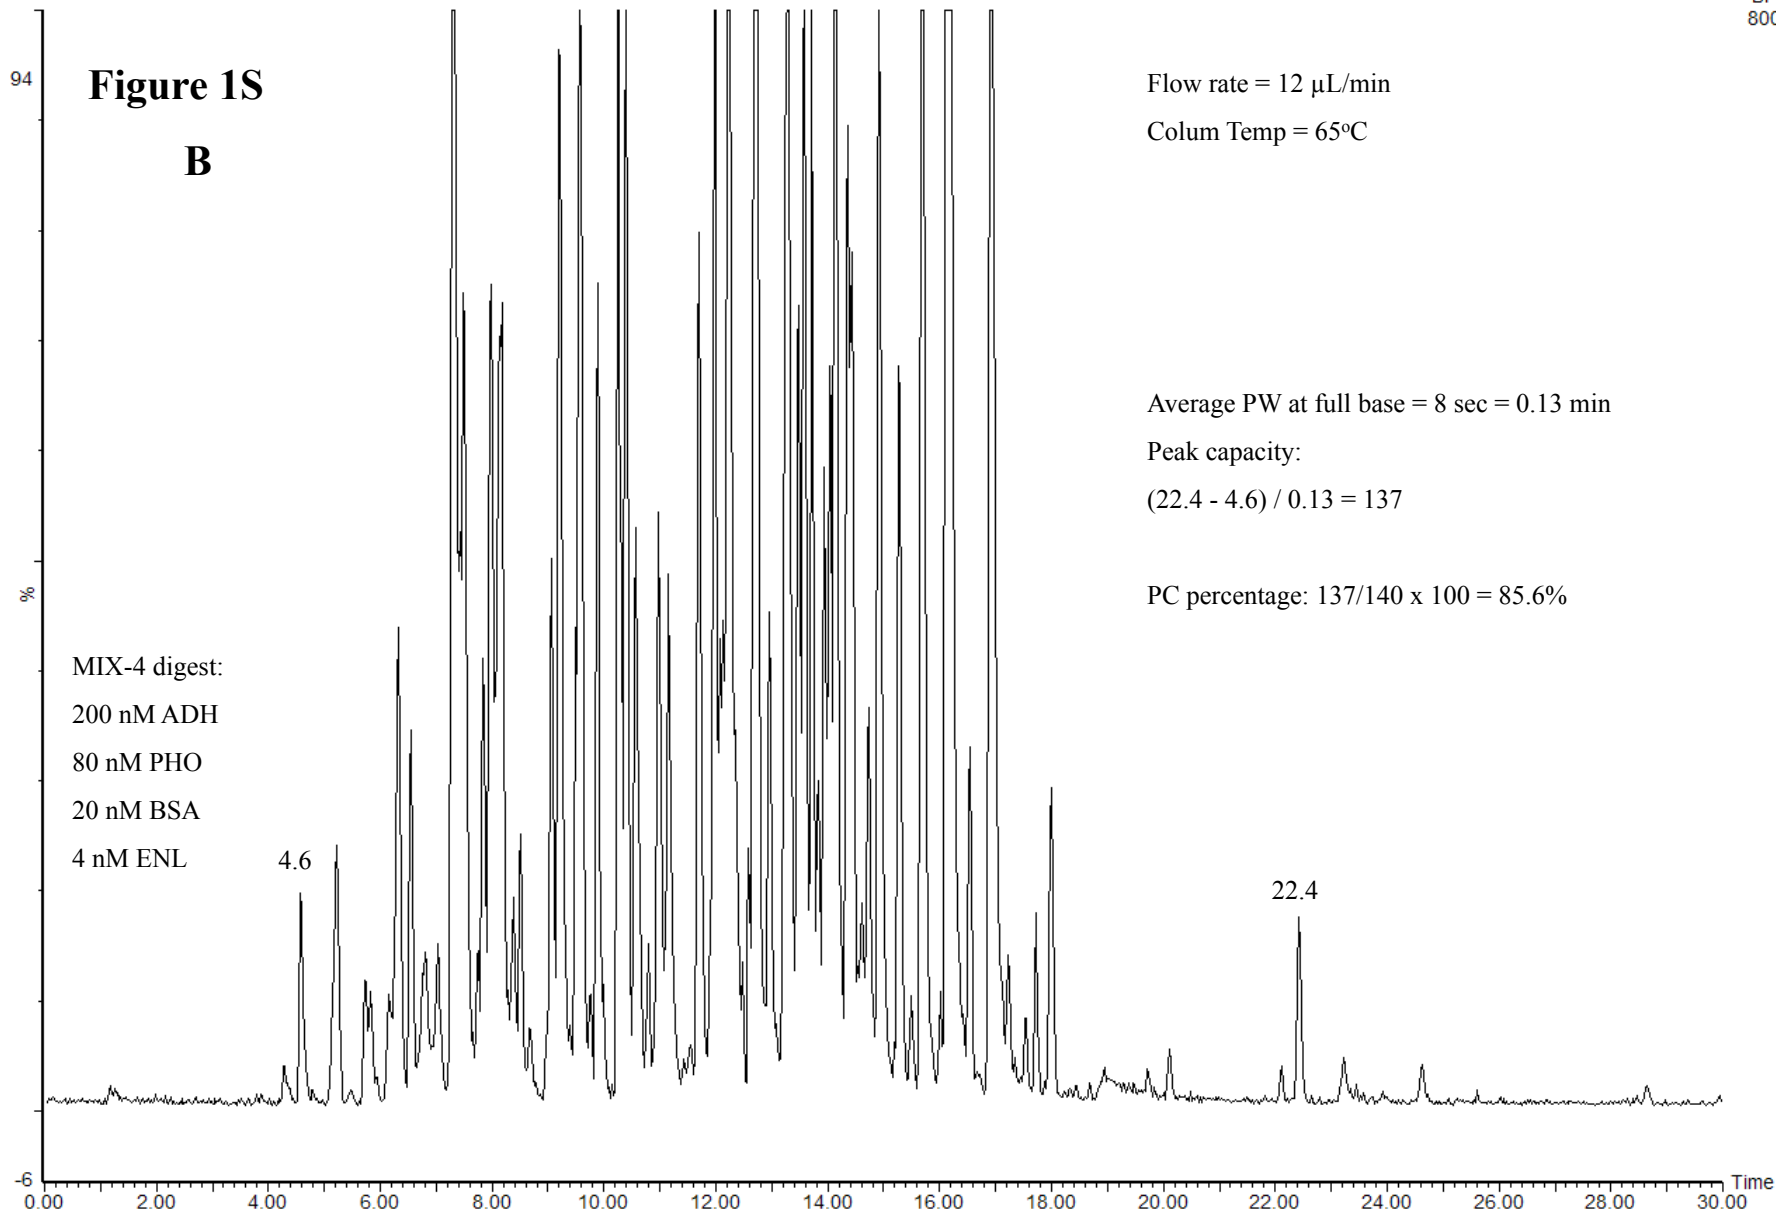

**Figure 2S**

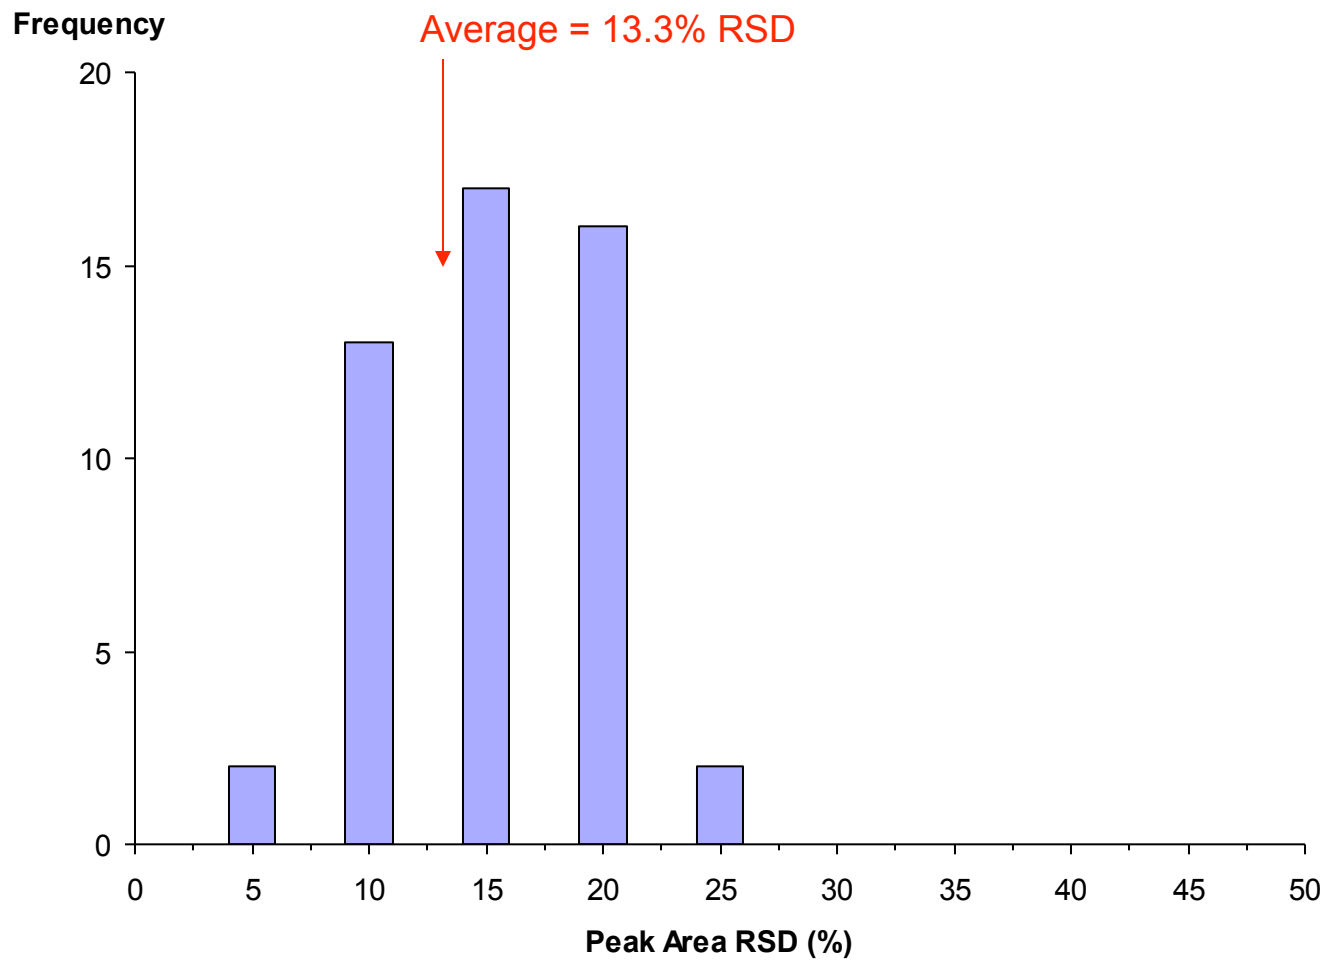

## Table IS

| No crt | Peptide sequence<br>Sequence | Protein ID /<br>species                                 | SwissProt<br>Accession no | Retention<br>time (min) | Precursor /<br>Charge state | Fragment<br>I     | Fragment<br>II    | Collision<br>Energy (eV) | Dwell<br>Time (ms) |
|--------|------------------------------|---------------------------------------------------------|---------------------------|-------------------------|-----------------------------|-------------------|-------------------|--------------------------|--------------------|
| 1      | GVEKPLR                      | Insulin-like growth factor binding protein 4 (mouse)    | P47879                    | 5.9                     | 399.7 (+2)                  | 385.2 (y3)        | 513.3 (y4)        | 16                       | 20                 |
| 2      | GPSSVEDIK                    | Nucleophosmin (mouse)                                   | Q61937                    | 7.5                     | 466.2 (+2)                  | 603.3 (y5)        | 774.4 (y7)        | 18                       | 20                 |
| 3      | STTTGHLIYK                   | <b>Elongation factor 1-alpha (mouse)</b>                | <b>P10126</b>             | <b>7.7</b>              | <b>560.8 (+2)</b>           | <b>730.4 (y6)</b> | <b>831.5 (y7)</b> | <b>22</b>                | <b>20</b>          |
| 4      | GFVLHK                       | Plasminogen activator/inhibitor 1 RNA bp (mouse)        | Q9CY58                    | 8.0                     | 350.7 (+2)                  | 397.3 (y3)        | 496.3 (y4)        | 15                       | 20                 |
| 5      | VEIANDQGNR                   | 78 kDa glucose regulated protein (hamster)              | P07823                    | 8.1                     | 614.8 (+2)                  | 774.3 (y7)        | 887.5 (y8)        | 24                       | 20                 |
| 6      | <b>GAAQNIIPASTGAAK</b>       | <b>Glyceraldehyde 3-P dehydrogenase (hamster)</b>       | <b>Q0QET9</b>             | <b>9.1</b>              | <b>685.4 (+2)</b>           | <b>702.4 (y8)</b> | <b>815.5 (y9)</b> | <b>26</b>                | <b>20</b>          |
| 7      | APIIAVTR                     | Pyruvate kinase isozyme M1/M2 (mouse)                   | P52480                    | 9.4                     | 420.8 (+2)                  | 446.3 (y4)        | 559.3 (y5)        | 17                       | 20                 |
| 8      | ELAEDGYSGVEVR                | 40S ribosomal protein S3 (mouse)                        | P62908                    | 9.5                     | 712.3 (+2)                  | 646.4 (y6)        | 981.5 (y9)        | 27                       | 25                 |
| 9      | SVSLYYTGEK                   | Nucleolin (hamster)                                     | P08199                    | 9.7                     | 573.8 (+2)                  | 760.3 (y6)        | 960.5 (y8)        | 22                       | 20                 |
| 10     | IEDLSQQAQLAAAEK              | Nascent polypeptide-associated complex alpha su (mouse) | P70670                    | 9.8                     | 807.9 (+2)                  | 730.4 (y7)        | 929.5 (y9)        | 30                       | 20                 |
| 11     | <b>ALIAAQYSGAQR</b>          | <b>Elongation factor 1-gamma (mouse)</b>                | <b>Q9D8N0</b>             | <b>9.9</b>              | <b>674.4 (+2)</b>           | <b>780.4 (y7)</b> | <b>979.5 (y9)</b> | <b>26</b>                | <b>20</b>          |
| 12     | DLKDYFSK                     | Heterogeneous nuclear riboprotein D0 isoform (mouse)    | Q60668                    | 10.6                    | 508.3 (+2)                  | 659.3 (y5)        | 787.4 (y6)        | 20                       | 20                 |
| 13     | IFVGGLSPDTPPEEK              | Heterogeneous nuclear riboprotein D0 isoform (mouse)    | Q60668                    | 11.0                    | 744.9 (+2)                  | 815.4 (y7)        | 1228.6 (y12)      | 28                       | 20                 |
| 14     | IFVGGLNPEATEEK               | Heterogeneous nuclear riboprotein A/B isoform (mouse)   | Q99020                    | 11.3                    | 752.4 (+2)                  | 803.4 (y7)        | 1144.6 (y11)      | 28                       | 20                 |
| 15     | AELNEFLTR                    | 40S ribosomal protein S3 (mouse)                        | P62908                    | 11.6                    | 546.8 (+2)                  | 779.4 (y6)        | 892.5 (y7)        | 21                       | 15                 |
| 16     | LSSFIGAIAGDLVK               | T complex protein 1 beta su (mouse)                     | P80314                    | 11.8                    | 752.4 (+2)                  | 474.3 (y4)        | 531.3 (y5)        | 28                       | 25                 |
| 17     | <b>SLNLSLEEA</b>             | <b>Clusterin (mouse)</b>                                | <b>Q06890</b>             | <b>11.9</b>             | <b>552.3 (+2)</b>           | <b>790.4 (y7)</b> | <b>903.5 (y8)</b> | <b>21</b>                | <b>25</b>          |
| 18     | SPASDTYIVFGEAK               | Nascent polypeptide-associated complex alpha su (mouse) | P70670                    | 11.9                    | 742.9 (+2)                  | 551.3 (y5)        | 1229.6 (y11)      | 28                       | 15                 |
| 19     | VLFDTGLVNPR                  | Nidogen-1 (mouse)                                       | P10493                    | 12.5                    | 615.8 (+2)                  | 756.4 (y7)        | 1018.5 (y9)       | 24                       | 30                 |
| 20     | LGGSAVISLEGKPL               | Cofilin-1 (mouse)                                       | P18760                    | 12.7                    | 670.9 (+2)                  | 743.4 (y7)        | 856.5 (y8)        | 25                       | 35                 |
| 21     | GFGFVDFNSEEDAK               | Nucleolin (hamster)                                     | P08199                    | 13.1                    | 781.3 (+2)                  | 1054.4 (y9)       | 1153.5 (y10)      | 29                       | 15                 |
| 22     | IYVDDGLISLQVK                | Pyruvate kinase isozyme M1/M2 (mouse)                   | P52480                    | 13.6                    | 731.9 (+2)                  | 1087.6 (y10)      | 1186.7 (y11)      | 28                       | 20                 |
| 23     | VHLVGIDIFTGK                 | Eukaryotic translation/initiation factor 5A-1 (mouse)   | P63242                    | 13.7                    | 649.9 (+2)                  | 680.4 (y6)        | 1062.6 (y10)      | 25                       | 25                 |
| 24     | LSAEDLVLEGAGLR               | Laminin gamma-1 subunit (mouse)                         | P02468                    | 13.8                    | 721.9 (+2)                  | 715.4 (y7)        | 814.5 (y8)        | 27                       | 30                 |
| 25     | LVPGGGATEIELAK               | T complex protein 1 theta su (mouse)                    | P42932                    | 14.7                    | 677.9 (+2)                  | 684.4 (y6-H2O)    | 1045.6 (y11)      | 26                       | 30                 |

**Table IIS**

| Peptide<br>sequence | Protein<br>ID     | RT<br>(min) | MRM Transition  |                                 | CV<br>(V) | CE<br>(eV) |
|---------------------|-------------------|-------------|-----------------|---------------------------------|-----------|------------|
|                     |                   |             | Native          | <sup>13</sup> C <sup>15</sup> N |           |            |
| SLLNSLEEAK          | Clusterin         | 12.2        | 552.3 -> 903.5  | 556.3 -> 911.5                  | 35        | 21         |
| STTTGHLIYK          | Elongation factor | 8.3         | 560.8 -> 831.5  | 564.8 -> 839.5                  | 35        | 22         |
| GAAQNIIPASTGAAK     | GAD3-PDH          | 9.6         | 685.4 -> 702.4  | 689.4 -> 710.4                  | 35        | 26         |
| VLFD TGLVNP R       | Nidogen-1         | 12.9        | 615.8 -> 1018.5 | 620.8 -> 1028.5                 | 35        | 24         |

**Table IIS**

| Sample no | Sample ID | CHO Cell Line | Protein conc (mg/mL) | No of HCPs Identified | Common HCPs | HCP conc (ppm) | PTG1 purity (%) |
|-----------|-----------|---------------|----------------------|-----------------------|-------------|----------------|-----------------|
| 1         | A1        | DG44          | 5.00                 | 21                    | 4           | 5945           | 94.1            |
| 2         | A2        | DG44          | 7.37                 | 23                    | 4           | 7190           | 92.8            |
| 3         | B1        | DG44          | 5.79                 | 30                    | 4           | 12897          | 87.1            |
| 4         | B2        | DG44          | 4.47                 | 30                    | 4           | 15302          | 84.3            |
| 5         | C         | CHO-S         | 3.88                 | 5                     | 4           | 1151           | 98.8            |
| 6         | D         | CHO-S         | 5.00                 | 9                     | 4           | 1020           | 99.0            |
